# Supplementary material for: Circulating Transcriptional Profile Modulation in Response to Metabolic Unbalance Due to Long-Term Exercise in Equine Athletes: A Pilot Study
Source: MDPI journal article supplement (doi:10.3390/genes12121965), 2021-12-09
Supplement: s1 [file s1]

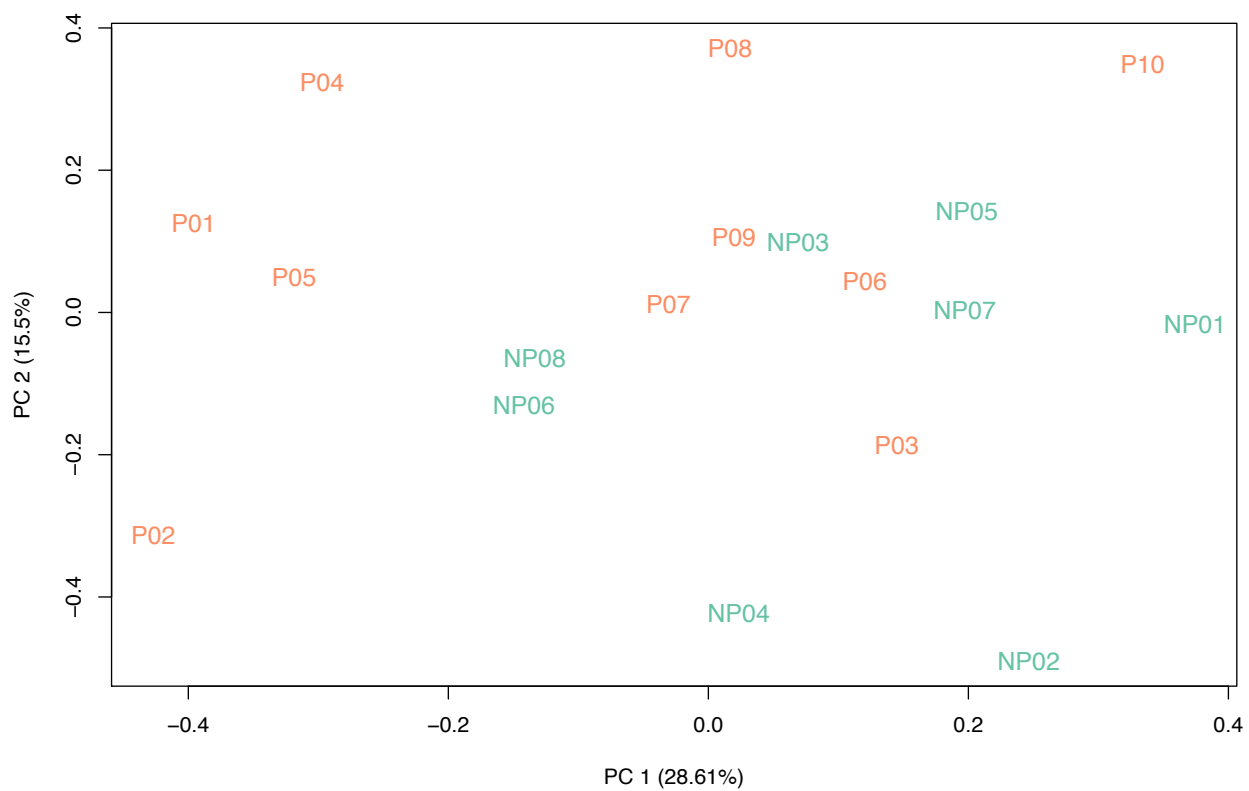

**Figure S1.** Principal Component Analysis based on miRNA expression values after spike-in correction of the two libraries: P (Performer) and NP (Non-Performer). The separation between the two groups was almost evident.
