# Supplementary material for: Circulating Transcriptional Profile Modulation in Response to Metabolic Unbalance Due to Long-Term Exercise in Equine Athletes: A Pilot Study
Source: MDPI journal article supplement (doi:10.3390/genes12121965), 2021-12-09
Supplement: s1 [file s1]

| Horse | Distance travelled (km); class | Average speed (km/h) | Heart rate (bpm) | Cardiac Recovery index* | Respiratory | Mucous membrane colour | Capillary refill time (sec) | Skin test (sec) | Gut sounds | Lesions | Muscle tone | Gait |
|-------|--------------------------------|----------------------|------------------|-------------------------|-------------|------------------------|-----------------------------|-----------------|------------|---------|-------------|------|
| P1    | 94; CEI*                       | 14,677               | 52               | 4                       | OK          | B                      | 2                           | 1               | A          | A       | A           | A    |
| P2    | 94; CEI*                       | 14,588               | 54               | 2                       | OK          | B                      | 1                           | 1               | A          | A       | A           | A    |
| P3    | 84; CEN B                      | 15,797               | 45               | 3                       | OK          | A                      | 1                           | 1               | A          | A       | A           | B    |
| P4    | 81; CEN B                      | 16,003               | 54               | 2                       | OK          | B                      | 1                           | 1               | A          | A       | A           | A    |
| P5    | 81; CEN B                      | 17,123               | 56               | 0                       | OK          | B                      | 1                           | 2               | A          | A       | A           | A    |
| P6    | 81; CEN B                      | 14,143               | 62               | 0                       | OK          | A                      | 1                           | 1               | A          | A       | A           | A    |
| P7    | 91; CEI*                       | 19,983               | 55               | 5                       | OK          | B                      | 2                           | 2               | A          | A       | A           | A    |
| P8    | 91; CEI*                       | 18,343               | 50               | 2                       | OK          | B                      | 2                           | 2               | B          | A       | A           | A    |
| P9    | 81; CEN B                      | 15,053               | 56               | 0                       | OK          | B                      | 1                           | 2               | A          | A       | A           | B    |
| P10   | 91; CEI*                       | 16,139               | 54               | 2                       | OK          | A                      | 2                           | 1               | B          | A       | A           | A    |
| NP1   | 84; CEI***                     | 17,433               | 69               | na                      | OK          | A                      | 1                           | 1               | A          | A       | A           | A    |
| NP2   | 140; CEI***                    | 13,106               | 75               | na                      | OK          | C                      | 3                           | 2               | B          | A       | B           | B    |
| NP3   | 114; CEI***                    | 14,531               | 57               | 7                       | OK          | A                      | 1                           | 1               | B          | A       | A           | A    |
| NP4   | 68; CEI***                     | 13,701               | 52               | 8                       | OK          | B                      | 2                           | 1               | B          | A       | A           | A    |
| NP5   | 94; CEI***                     | 14,646               | 67               | na                      | OK          | C                      | 3                           | 1               | B          | A       | A           | A    |
| NP6   | 114; CEI***                    | 14,094               | 75               | na                      | OK          | C                      | 3                           | 2               | C          | A       | A           | A    |
| NP7   | 114; CEI**                     | 16,607               | 76               | na                      | OK          | B                      | 2                           | 2               | B          | A       | A           | A    |
| NP8   | 76; CEN B                      | 16,625               | 60               | 8                       | OK          | B                      | 1                           | 2               | B          | A       | A           | A    |

CEI = Concours de Raid d'Endurance International; \* = 80-119 km; \*\* = 120-139 km; \*\*\*160 km. (Endurance Rules 2018).

CEN B = National Endurance Competition of 80-99 km.

Bpm = beats per minutes; Cardiac recovery index: difference between the first heart rate assessed after the entry in the vet gate and the second heart rate assessed after the evaluation of the gait in a straight line of 40 m trotting back and forth; na = not applicable as the horse was eliminated for high heart rate (metabolic) and cardiac recovery index is not reported in the vet card in these cases.

Respiratory evaluation consists in OK (normal) or abnormal.

Mucous membrane colour: A = normal; B = moderately hyperemic; C = severe congested

Gut sound: A = normal; B = decreased; C = absent. Lesions represents skin lesions: A = normal.

Muscle tone: A = normal; B = mildly increased; C = myopathy

Gait: A = sound; B = mildly irregular but fit to compete; C = irregular gait

Table S1. Details of the distance travelled, average speed and details of the veterinary inspection reported in the vet card at the time of completion (group P) or elimination (group NP).
