# Supplementary material for: Circulating Transcriptional Profile Modulation in Response to Metabolic Unbalance Due to Long-Term Exercise in Equine Athletes: A Pilot Study
Source: MDPI journal article supplement (doi:10.3390/genes12121965), 2021-12-09
Supplement: s1 [file s1]

Table S2. Hematology and Clinical Chemistry values differences between groups P and NP.

|                    | Parameters                   | P Mean | NP Mean | Difference NP vs P | <i>p</i> -value       |
|--------------------|------------------------------|--------|---------|--------------------|-----------------------|
| Hematology         | WBCs (*10 <sup>3</sup> /μL)  | 12.9   | 8.6     | -4.3               | 0.004                 |
|                    | RBCs (*10 <sup>6</sup> /μL)  | 9.6    | 12.0    | 2.4                | 1.53x10 <sup>-4</sup> |
|                    | Hb (g/dL)                    | 15.1   | 24.3    | 9.2                | 5.83x10 <sup>-7</sup> |
|                    | Hct (%)                      | 40.7   | 67.8    | 27.0               | 2.63x10 <sup>-7</sup> |
|                    | PLT (*10 <sup>3</sup> /μL)   | 157.9  | 195.7   | 37.8               | 0.144                 |
|                    | MCV (fl)                     | 42.8   | 46.4    | 3.7                | 0.008                 |
|                    | MCH (pg)                     | 15.9   | 15.3    | -0.6               | 0.143                 |
|                    | MCHC (%)                     | 37.2   | 32.9    | -4.3               | 7.71x10 <sup>-5</sup> |
|                    | RDW (%)                      | 23.3   | 19.5    | -3.8               | 0.016                 |
|                    | MPV (fl)                     | 6.1    | 6.0     | 0.0                | 0.479                 |
|                    | % Lymphocytes                | 15.1   | 11.5    | -3.6               | 0.082                 |
|                    | % Monocytes                  | 2.6    | 1.8     | -0.7               | 0.101                 |
|                    | % Granulocytes               | 82.0   | 86.7    | 4.7                | 0.078                 |
|                    | # Lymphocytes                | 1.3    | 0.9     | -0.4               | 0.013                 |
|                    | # Monocytes                  | 0.1    | 0.1     | 0.0                | 0.238                 |
|                    | # Granulocytes               | 12.2   | 7.6     | -4.6               | 0.024                 |
| Clinical Chemistry | Urea (mg/dl)                 | 47.3   | 61.6    | 14.3               | 0.018                 |
|                    | Creatinine (mg/dL)           | 1.7    | 2.4     | 0.7                | 0.001                 |
|                    | Total bilirubin (mg/dL)      | 5.0    | 4.9     | -0.1               | 0.938                 |
|                    | Direct bilirubin (mg/dL)     | 0.4    | 0.3     | -0.1               | 0.603                 |
|                    | Indirect bilirubin (mg/dL)   | 4.5    | 4.5     | 0.0                | 0.985                 |
|                    | AST (IU/L)                   | 451.4  | 576.4   | 125.0              | 0.085                 |
|                    | AST/km (IU/L)*               | 5.4    | 5.9     | 0.4                | 0.654                 |
|                    | GGT (IU/L)                   | 15.0   | 15.6    | 0.6                | 0.804                 |
|                    | CK (IU/L)                    | 2411.8 | 2823.5  | 411.8              | 0.699                 |
|                    | CK/km (IU/L)*                | 22.5   | 30.8    | 8.3                | 0.547                 |
|                    | LDH (IU/L)                   | 1252.8 | 1498.3  | 245.5              | 0.264                 |
|                    | LDH/km (IU/L)*               | 14.9   | 15.8    | 0.9                | 0.817                 |
|                    | Total plasma proteins (g/dL) | 7.4    | 8.5     | 1.1                | 3.82x10 <sup>-4</sup> |
|                    | Albumin (g/dL)               | 4.3    | 4.7     | 0.4                | 0.005                 |

\* These values were also normalized for the raced distance.
