# Supplementary material for: Circulating Transcriptional Profile Modulation in Response to Metabolic Unbalance Due to Long-Term Exercise in Equine Athletes: A Pilot Study
Source: MDPI journal article supplement (doi:10.3390/genes12121965), 2021-12-09
Supplement: s1 [file s1]

Table S3. Statistics of sequencing and mapping.

| Sample ID      | Reads after trimming | Uniquely Mapped on spike-in | %           | Uniquely Mapped on miRNA (mirbase22) | %            | Uniquely Mapped on genome (equcab3) | %            |
|----------------|----------------------|-----------------------------|-------------|--------------------------------------|--------------|-------------------------------------|--------------|
| P1             | 15,698,407           | 9,444                       | 0.06        | 1,373,474                            | 8.75         | 2,363,204                           | 16.55        |
| P2             | 4,020,540            | 2,490                       | 0.06        | 989,087                              | 24.62        | 635,793                             | 21.17        |
| P3             | 10,420,107           | 3,228                       | 0.03        | 5,122,653                            | 49.18        | 550,574                             | 12.11        |
| P4             | 18,604,477           | 6,632                       | 0.04        | 11,252,629                           | 60.51        | 462,384                             | 6.54         |
| P5             | 19,195,414           | 5,148                       | 0.03        | 1,476,715                            | 7.70         | 1,383,126                           | 7.82         |
| P6             | 16,993,953           | 11,232                      | 0.07        | 12,847,257                           | 75.65        | 693,555                             | 17.32        |
| P7             | 6,866,968            | 5,746                       | 0.08        | 5,708,927                            | 83.21        | 164,614                             | 14.75        |
| P8             | 17,357,639           | 8,198                       | 0.05        | 10,268,597                           | 59.19        | 1,182,511                           | 17.51        |
| P9             | 10,890,730           | 21,764                      | 0.2         | 7,028,060                            | 64.66        | 915,909                             | 25.82        |
| P10            | 27,130,659           | 9,997                       | 0.04        | 13,706,864                           | 50.54        | 1,451,798                           | 11.36        |
| NP1            | 26,045,724           | 16,587                      | 0.06        | 5,756,368                            | 22.12        | 1,469,640                           | 7.47         |
| NP2            | 9,278,343            | 786                         | 0.01        | 5,346,534                            | 57.63        | 283,818                             | 7.32         |
| NP3            | 12,280,022           | 16,012                      | 0.13        | 6,000,279                            | 48.93        | 755,481                             | 12.33        |
| NP4            | 9,794,772            | 3,090                       | 0.03        | 1,812,365                            | 18.51        | 445,557                             | 5.62         |
| NP5            | 20,300,578           | 7,022                       | 0.03        | 16,608,950                           | 81.84        | 237,707                             | 6.79         |
| NP6            | 5,380,246            | 1,287                       | 0.02        | 734,693                              | 13.66        | 318,622                             | 6.94         |
| NP7            | 15,295,203           | 2,436                       | 0.02        | 6,648,444                            | 43.47        | 733,906                             | 8.69         |
| NP8            | 11,564,159           | 1,353                       | 0.01        | 6,755,043                            | 58.42        | 460,032                             | 10.25        |
| <b>Average</b> | <b>14,284,330.06</b> | <b>7,358.44</b>             | <b>0.05</b> | <b>6,635,385.50</b>                  | <b>46.03</b> | <b>806,012.83</b>                   | <b>12.02</b> |
